Effect of testosterone on antler growth

1 **Effect of Testosterone on Antler Growth in Male Sambar Deer (*Rusaunicolor unicolor*) in**  
2 **Horton Plains National Park, Sri Lanka.**

3 D. S. Weerasekera<sup>1\*</sup>, N. L. Rathnasekara<sup>2</sup>, D.K.K. Nanayakkara<sup>3</sup>, H.M.S.S. Herath<sup>3</sup>, S.J.  
4 Perera<sup>4</sup>, K.B. Ranawana<sup>5</sup>

5 <sup>1</sup> Postgraduate Institute of Science, University of Peradeniya, Sri Lanka.

6 <sup>2</sup> Epsilon Crest Research, 6/6.67 Ward place, Colombo 07, Sri Lanka

7 <sup>3</sup> Nuclear Medicine Unit, Faculty of Medicine, University of Peradeniya, Peradeniya, Sri Lanka.

8 <sup>4</sup> Department of Natural Recourses, Sabaragamuwa University, Sri Lanka.

9 <sup>5</sup> Department of Zoology, Faculty of Science, University of Peradeniya, Peradeniya, Sri Lanka.

10 \*Author for Correspondence ([danushw2@gmail.com](mailto:danushw2@gmail.com))

11 **SUMMARY STATEMENT**

12 Testosterone concentration in fecal pellets of antler phases of male sambar deer in Horton plains National  
13 park, Sri Lanka evaluated by Radioimmunoassay kit. The results obtained in this study were agreement  
14 with identical research work carried out in other deer species with temperate ancestry.

15 **ABSTRACT**

16 This study establishes the relationship between testosterone concentration with the different antler phases  
17 in male sambar deer (*Rusa unicolor*) inhabiting the Horton plains National Park, Sri Lanka (HPNP). Antler  
18 growth of sambar was categorized into seven phases; Cast (C), Growing single spike (GS), Growing into a  
19 Y as first tine appears (GIY), Growing Velvet begins to harden as third appears (GVT), Growth completed  
20 - velvet shedding begins (VS), Hard antler (HA), Casting (CT) based on phenotypic observations. The  
21 fecal samples were collected from 10 male sambar deer in each different phases of the antler growth cycle.  
22 Fecal testosterone level was estimated using radioimmunoassay (RIA). The results disclose that the dry  
23 feces of sambar deer in hard antler phase have a highest mean testosterone concentration of  $18.52 \pm 01.87$   
24  $\text{ng g}^{-1}$ . In the GVT phase the mean testosterone concentration was  $09.50 \pm 2.01 \text{ng g}^{-1}$ , while in the VS phase  
25 the mean testosterone concentration increased to  $14 \pm 01.89 \text{ng g}^{-1}$ . The study also reveals a declination of  
26 the testosterone concentration ( $06.80 \pm 01.20 \text{ng g}^{-1}$ ) in CS phase. The C phase had a mean testosterone  
27 concentration of  $05.52 \pm 0.84 \text{ng g}^{-1}$ . The fecal testosterone levels of the male sambar deer in HPNP changes  
28 according to the phase of the antler cycle.

29 **Key words:** Sambar deer, Antler cycle, Testosterone

30

31

32

33

Effect of testosterone on antler growth

34

## INTRODUCTION

35 Sambar (*Rusa unicolor*) is the most widely spread deer in Asian continent (Chang et al., 2018;  
36 Chellappandian et al., 2014; Forsyth et al., 2014; Li, Ba, & Yang, 2016; Lin, Pei, Wang, & Liu, 2014; Oria  
37 et al., 2015; Radhakrishnan et al., 2012; Somma, Moura, Lange, Medeiros, & Montiani-Ferreira, 2016), that  
38 range from Sri Lanka (Rajapaksha, Thilakaratne, Chandrasiri, & Niroshan, 2002), India (Ajith Kumar et al.,  
39 2018; Pothana, Devi, & Goel, 2017), Southern Nepal (Thapa & Kelly, 2017), Burma (Gupta et al.,  
40 2018), throughout Southern China (Lin et al., 2014) and in South-Eastern Asia to the Pacific Coast and the  
41 islands of Borneo and Hainan (Ajith Kumar et al., 2018; Bhattacharjee & Franzmann, 1986; Brodie et al.,  
42 2015; Brodie, Helmy, Brockelman, & Maron, 2009; Hoogstraal & Wassef, 1982; Ismail & Jiwan, 2015;  
43 Jerrett, Slee, & Robertson, 1990). For the family Cervidae, most of the knowledge on reproductive biology  
44 has been originated from studies of temperate species that exhibit a distinct seasonal cycle of reproductive  
45 behavior and antler growth in males (Bhattacharjee & Franzmann, 1986; Chan, Tsai, Chen, Tung, & Chang,  
46 2009; Lin et al., 2014; Muir et al., 1997; Vongpralub et al., 2015). Studies on Reproductive Biology and the  
47 Antler Cycle conducted in tropical regions are rare.

48 Antlers are growing from the skull only in male deer, with a solid calcified core and are unique in that.  
49 They go through an annual cycle of rapid growth in preparation for the rutting season and are casted after  
50 the season (Munk, Garrison, Clemons, & Keel, 2015). They are casted and regrown from a blastema  
51 annually into three branched structures of cartilage and bone that are used for sparring and attraction in adult  
52 sambar deer (Dahlan & Dawend, 2013; Lin et al., 2014).

53 Reproductive steroid levels contribute to reproduction of animals (Washburn et al., 2004). Hormonal levels  
54 can be estimated in animals by using plasma or fecal matter (Chen et al., 2018; Quispe, Yohannes, & Gahr,  
55 2018). Estimating the hormone levels using fecal steroid assays provide a non-invasive method and have  
56 the capacity to develop long-term means of determining adrenocortical, testicular hormones in many  
57 vertebrate taxa (Spratt, Spratt, Bauman, & Chandler, 2018). Today the animal behavioral changes are  
58 possible to relate with changes in physiological processes (Dahlan & Dawend, 2013).

59

60

61

Effect of testosterone on antler growth

62

## MATERIALS AND METHODS

63

### Study area and the antler cycle

64 The study was carried out at the Horton Plains National Park (HPNP), Sri Lanka for a period of twelve  
65 months (01 January -31 December 2018). The HPNP was chosen for this study because of the large number  
66 of sambar deer inhabiting the park grasslands. There were over 800 sambar deer in the HPNP, during the  
67 commencement of the study (Personal communication). Based on our preliminary observations prior to the  
68 commencement of data collection, sambar males were grouped into seven 07categories based on their antler  
69 growth phase namely;(a) Cast, (b) Growing 1 – single pike, (c) Growing 2 - Antlers fork into a Y as first  
70 tine appears, (d) Growing 3 - Velvet begins to harden as third tine appears, (e) Growth completed - velvet  
71 shedding begins, (f) Hard antler and (g) Casting(Meng et al., 2015; Pereira, Duarte, & Negrao, 2005).

72 Antler growth categories were identified by physical appearance of the antlers, especially their sharpness  
73 and length (Suttie, Fennessy, Lapwood, & Corson, 1995), while the old males with irregular antler casting  
74 were not taken to the experiment. Additional characters that were considered for this study were the size of  
75 the body and antlers (Hu et al., 2017; Lemaitre et al., 2018).

76

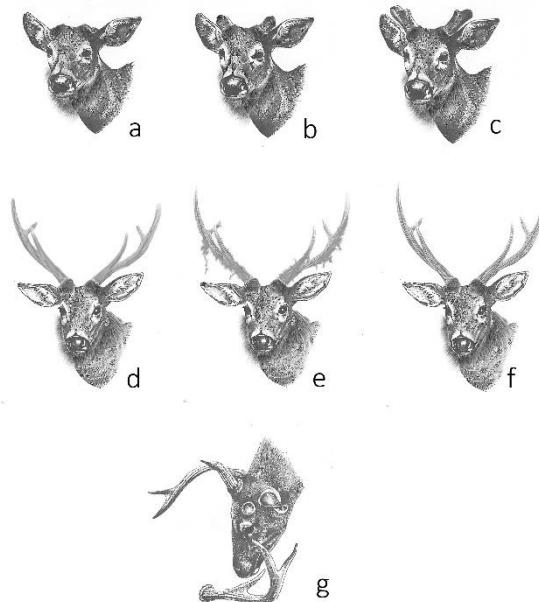

**Figure 1.**Antler phases: (a) Cast, (b) Growing 1 – Single Spike, (c) Growing 2 - Antlers Fork into a Y as First Tine Appears, (d) Growing 3 - Velvet Begins to Harden as Third Tine Appears, (e) Growth Completed - Velvet Shedding Begins, (f) Hard Antler and (g) Casting.

87

88

Effect of testosterone on antler growth

89 Fecal Sample collection

90 Fecal pellets were collected on the second week of every month within half an hour of voidance. Collected  
91 fecal pellets were labeled with antler phase and kept in polyethylene covers at -20 °C until extraction for  
92 Radioimmunoassay (RIA) analysis.

93

94 Fecal steroid extraction and enzyme immunoassay

95 In a standard oven, frozen fecal specimens were dried. Each sample was carefully powdered and blended.  
96 A subsample weighing 0.2 g was mixed in a test tube with 5 ml of 90% ethanol and briefly vortexed. In a  
97 water bath (90 oC) the tubes were boiled for 20 minutes, adding ethyl alcohol to prevent drying. The extract  
98 was pre-boiled with 90% ethanol and centrifuged for 20 minutes at 1500 rpm.

99 The extraction was poured into another storage vial. A further 90% ethanol was added to the remaining  
100 fecal powder and vortexed for 30 seconds and centrifuged for 15 minutes at 1500 rpm, combined and dried  
101 down, the first and second extracts were reconstituted in one ml of methanol and vortexed for a short time.  
102 Until the assessment of RIA, the methanol samples were placed at -20 oC. For this purpose, the 125I  
103 Testosterone RIA kit (Blotner et al., 1996) was used. The concentrations of testosterone were associated  
104 with the stage of antler.

105

106 **RESULTS**

107 The antler cycle of sambar in HPNP

108 The sambar deer herds in HPNP selected for the study had been observed throughout the year following all  
109 identified antler phases (n=7). Any of the seven phases of the antler cycle could be observed at any given  
110 point of time during the year, indicating no marked seasonality in antler cycle. Shipka et al., (2002)  
111 suggested that deer sustenance near the equator, where seasonal day length differs only slightly, tend to be  
112 asynchronous in both their antler and sexual cycles. Seasonal relation in the antler cycle in a herd of Red  
113 deer by Wilson (1991) and Loudon et al., (1992) and Curlew et al., (1988) are also supportive of the above  
114 findings on sambar deer stags in the HPNP. This observation is also supported by Heckeberg et al., (2017)  
115 who reported that most of the cervids in equatorial region are seasonal.

Effect of testosterone on antler growth

116 Examination of the male sambar deer in HPNP before the commencement of this study revealed that the  
117 sambar deer antlers were in velvet growth for a duration of seven to eight months. The hard antlers start  
118 displaying for the whole rutting season which lasted for about four to five months. This was followed by  
119 the antler casting stage, where the deer cast their antlers either in a fight, or hitting against a tree or any  
120 other hard structure (Chapman & Harris, 1991; Loudon & Curlewis, 1988; Wilson, Walker, Bond,  
121 Middleberg, & Staples, 1991).

122 Kierdorf et al. (2012) noted that antlers were casted after the rutting / mating season, while Price et al. (20  
123 05) noted that deer cast antlers for combat and show during the prior mating season in each spring.  
124 However, it was observed that most of the stags lost both the antlers on the same day while some stags were  
125 observed to cast their antlers with a gap of 2-3 days (J. S. Price, Allen, Faucheux, Althnaian, & Mount,  
126 2005). This stage did not last long, as antler growth is a rapid continuous cycle, and the beginning of the  
127 next pair of antlers set in without a long interval. The phases of the antler growth of sambar deer identified  
128 from our observations in HPNP are shown in the Figure 1. A more detailed description of the antler cycle  
129 of sambar in HPNP will be published elsewhere with further observations, as it is not the primary objective  
130 of this paper.

131 Concentration of fecal Testosterone is clearly associated with the phases of antler development in Cervids  
132 (Bubenik, Pomerantz, Schams, & Smith, 1987; Lincoln, Fraser, & Fletcher, 1982). Male sambars in HPNP  
133 with cast antler phase maintained a mean testosterone level of  $05.52 \pm 0.84$  ng g<sup>-1</sup> of dry feces. The maximum  
134 Testosterone level of  $06.30$  ng g<sup>-1</sup> of dry feces was recorded in the cast antler phase while the minimum  
135 testosterone level of  $04.20$  ng g<sup>-1</sup> during the same phase, together with a median value of  $06$  ng g<sup>-1</sup> and  
136 ranging for  $\pm 2.1$  ng g<sup>-1</sup> (Figure 2 a). In white-tailed deer (*Odocoileus virginianus*) the Testosterone exhibits  
137 the highest concentration during the mating season (Bubenik et al., 1987). In red deer (*Cervus elaphus*),  
138 testosterone exhibits the highest concentration during the rutting season (J. Price, Faucheux, & Allen, 2005).

139

140

141

142

Effect of testosterone on antler growth

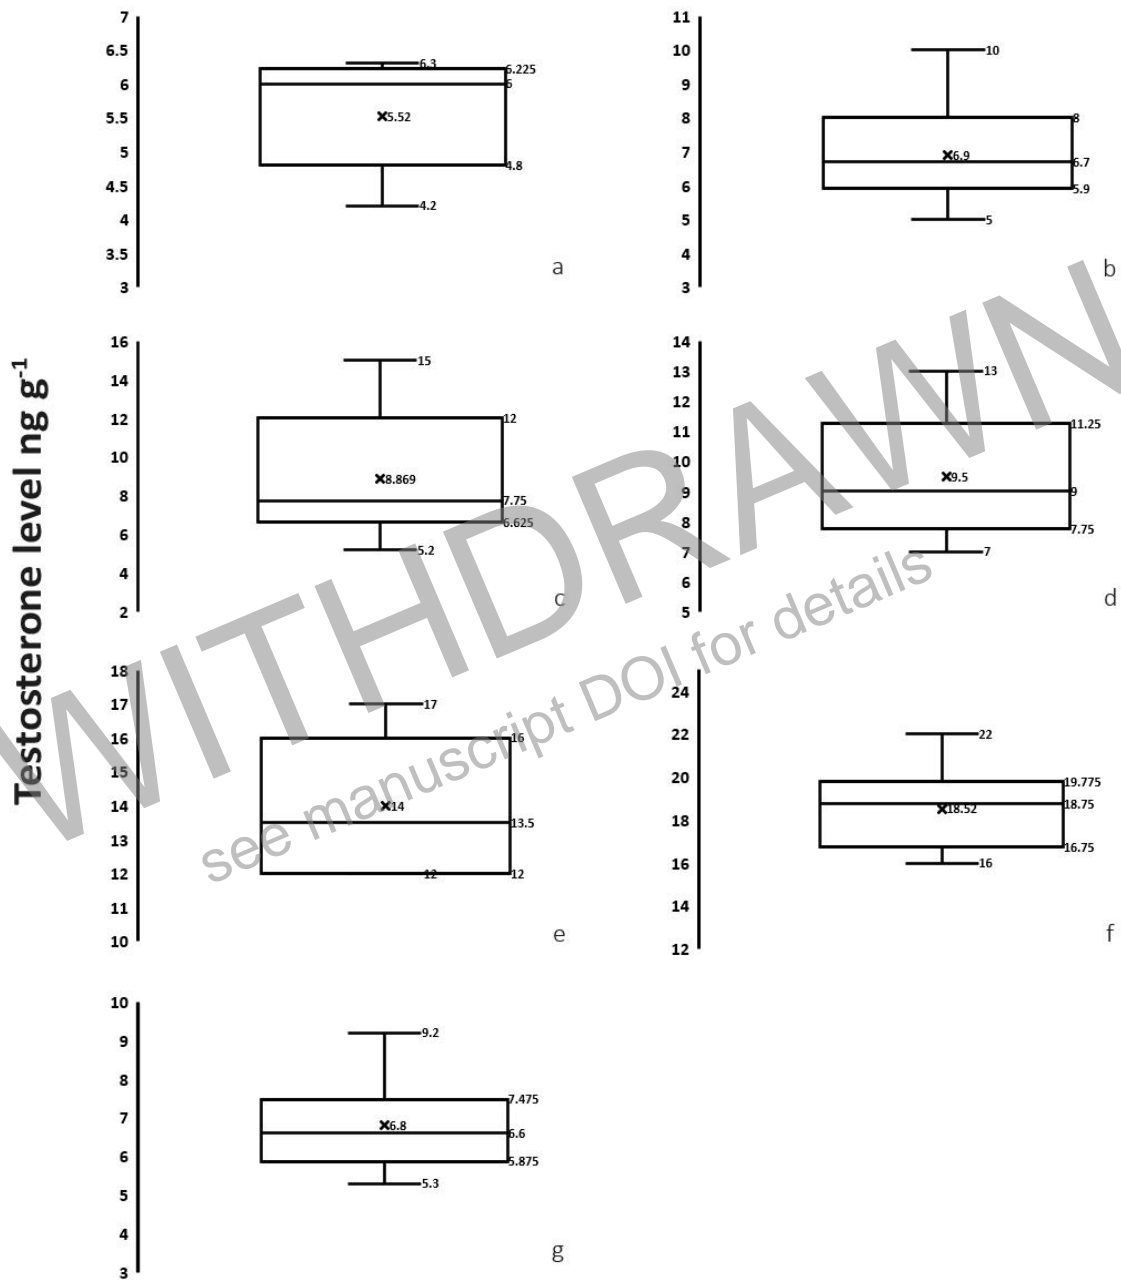

143

144 **Figure 2.** Box and whisker plots for mean fecal testosterone levels in ng g<sup>-1</sup> during different antler phases  
 145 of sambar in HPNP. Testosterone was obtained and measured from RIA using methanol. Fecal matter  
 146 analyzed belongs to either of the antler phases; (a) Cast, (b) Growing 1 – Single Bud, (c) Growing 2 -  
 147 Antlers Fork into a Y as First Tine Appears, (d) Growing 3 - Velvet Begins to Harden as Third Tine  
 148 Appears, (e) Growth Completed - Velvet Shedding Begins, (f) Hard Antler and (g) Casting.

149

Effect of testosterone on antler growth

150 The mean testosterone level of male sambar deer in growing antler phase were  $06.190 \pm 01.46 \text{ ng g}^{-1}$  of dry  
151 feces with a median of  $06.70 \text{ ng g}^{-1}$ . The maximum level of  $10 \text{ ng g}^{-1}$  and minimum of  $05 \text{ ng g}^{-1}$  was recorded  
152 in the dried feces in the stags passing growing phase (Figure 2).

153 Indistinguishable findings have been noted on red deer stags, which reveals that mean serum testosterone  
154 concentrations rose during the breeding season until about one to two weeks before the peak of the rut.  
155 (Gaspar-Lopez et al., 2010). Stags in growing antler fork into a Y as first tine appear phase showing an  
156 elevation in mean testosterone level as  $08.87 \pm 03.13 \text{ ng g}^{-1}$  of dry feces with maximum level of testosterone  
157 in dry feces was  $15 \text{ ng g}^{-1}$ , and the minimum level of testosterone in the same phase was  $05.20 \text{ ng g}^{-1}$  with  
158 a median value of  $07.75 \text{ ng g}^{-1}$  with a range of  $09.80 \text{ ng g}^{-1}$  (Figure 2 c). The casting is promoted by  
159 testosterone levels of  $9.56 \pm 1.94 \text{ ng g}^{-1}$  of dry feces for the rest of the study period. Ditchkoff et al (2001)  
160 discovered that Testosterone showed the largest concentration during the rut in white-tailed deer. Mean  
161 Testosterone concentration of Sambar deer Stags in Growing Third Tine - Velvet Begins to Harden phase  
162 was  $09.50 \pm 2.01 \text{ ng g}^{-1}$ , with maximum level of  $13 \text{ ng g}^{-1}$  and minimum of  $07 \text{ ng g}^{-1}$  testosterone  
163 concentration. During the Growing Third Tine - Velvet Begins to Harden phase, the median testosterone  
164 level in dried feces was  $09 \text{ ng g}^{-1}$  and the range was  $06 \text{ ng g}^{-1}$  (Figure 2 d).

165 Median Testosterone concentration of male sambar deer of HPNP in Growing Finished - Velvet Shedding  
166 Begins phase was  $13.50 \text{ ng g}^{-1}$  of dry feces and the mean Testosterone level was  $14 \pm 01.89 \text{ ng g}^{-1}$  with a  
167 maximum concentration of  $17 \text{ ng g}^{-1}$  and minimum of  $12 \text{ ng g}^{-1}$  of Testosterone level, ranging from  $05 \text{ ng g}^{-1}$   
168 (Figure 2). Stags in Hard Antler phase maintained a mean Testosterone levels of  $18.52 \pm 01.87 \text{ ng g}^{-1}$   
169 of dry feces and the median testosterone level was  $18.75 \text{ ng g}^{-1}$ . The maximum Testosterone level of stags  
170 in Hard Antler phase was  $22 \text{ ng g}^{-1}$  and the minimum was  $16 \text{ ng g}^{-1}$  with a range of  $06 \text{ ng g}^{-1}$  (Figure 2).  
171 This was a well-marked increase to the maximum mean Testosterone level in dried fecal matter compared  
172 to other phases (Figure 3).

173 Mean testosterone level in dried fecal matter of male sambar deer in casting phase was maintained at  $06.80 \pm$   
174  $01.20 \text{ ng g}^{-1}$  of dry feces and the median testosterone level in dried fecal matter was  $06.60 \text{ ng g}^{-1}$ . The  
175 maximum level of testosterone in dried fecal matter of stags in Casting phase was  $09.20 \text{ ng g}^{-1}$  and the  
176 minimum level was  $05.30 \text{ ng g}^{-1}$  with a range of  $03.90 \text{ ng g}^{-1}$  (Figure 2 g). Uvira et al., (2018) and  
177 Antler development cycles are strongly linked to staggered sexual cycles and can be ascribed directly to d  
178 differences in seasonal photoperiod affecting gonadal steroidogenic activity in temperate regions. Stewart



#### Effect of testosterone on antler growth

179 et al., (2018) the largest concentration of testosterone observed at the beginning of the rutting season and a  
180 continuous decrease thereafter, which fully supported the outcomes of this research. Testosterone levels  
181 peak immediately before rut and it is the rapid decline in its level that causes Antler Casting. Antler Growth  
182 occurs at a low testosterone concentration and is seen increasing when the Antler Growth nears completion.  
183 Velvet Shedding and Antler Hardening is a consequence of high testosterone levels (Lincoln, Fraser, &  
184 Fletcher, 1984; Suttie, Lincoln, & Kay, 1984).

185

186

### DISCUSSION

187 The fecal testosterone levels of the seven antler phases of male sambar deer in HPNP evaluated by RIA kit  
188 display that testosterone strive a powerful constraint on the phases in antler cycle. The sambar in hard antler  
189 phase reported to have a more elevated mean testosterone concentration in relation to the in velvet phase of  
190 the antler cycle. The results obtained in the present study were absolutely in agreement with identical  
191 research work carried out in other deer species which were predominantly with temperate ancestry. The  
192 variations of testosterone level observed in this research work streamlined with the findings of many other  
193 researchers (Bubenik, Brown, & Schams, 1991; Bubenik & Schams, 1986; Muir, Sykes, & Barrell, 1988;  
194 Ventrella et al., 2018). These studies also admit that, it is the immediate drop in the testosterone  
195 concentration which element the Casting of Antler (Figure 1). Velvet shedding was preceded by an increase  
196 the testosterone level highlighting its role (Figure 3). Nevertheless, the study could not conclude a clear  
197 seasonality in the antler cycle of sambar in HPNP as reported for many Cervids with temperate ancestry.



Effect of testosterone on antler growth

198

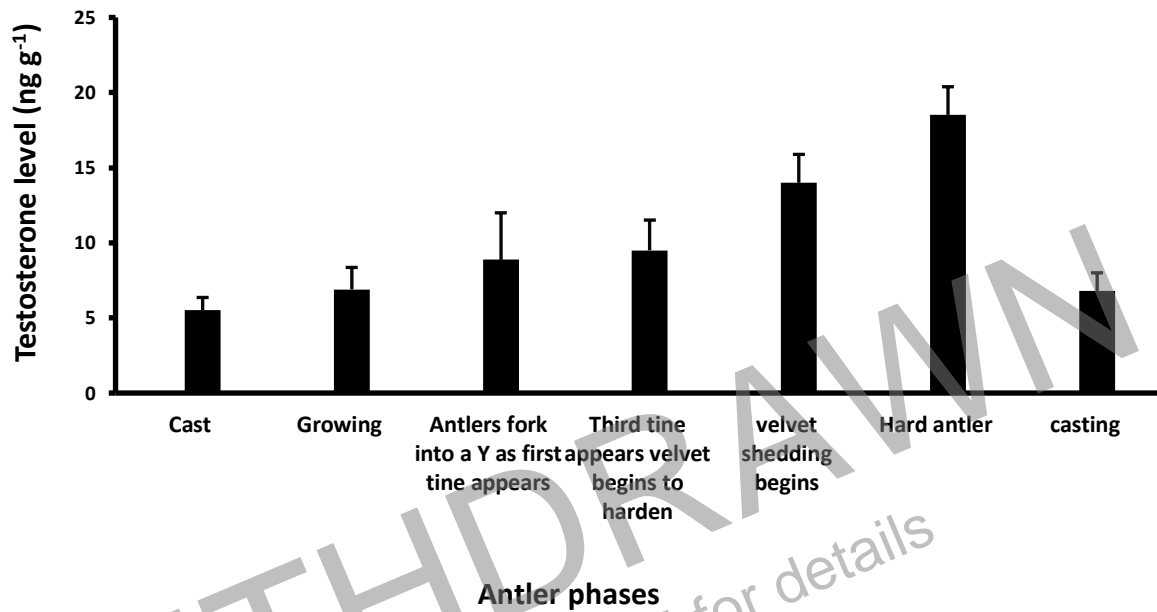

199 **Figure 3.** Phases in antler cycle plotted against the fecal testosterone concentrations in the dried fecal matter  
200 of the Sambar deer monitored from January 2018 to January 2019 in Horton Plains National Park.

201

202

203

204

205

206

207

208

209

210

211

212

- 214 **Ajith Kumar, K. G., Ravindran, R., Johns, J., Chandy, G., Rajagopal, K., Chandrasekhar, L., . . .**  
215 **Ghosh, S.** (2018). Ixodid Tick Vectors of Wild Mammals and Reptiles of Southern India. *J*  
216 *Arthropod Borne Dis*, 12(3), 276-285.
- 217 **Bhattacharjee, K. K., & Franzmann, A. W.** (1986). Intestinal rupture in a free-living sambar deer (*Cervus*  
218 *unicolor*) in India. *J Wildl Dis*, 22(1), 136.
- 219 **Brodie, J. F., Giordano, A. J., Dickson, B., Hebblewhite, M., Bernard, H., Mohd-Azlan, J., . . . Ambu,**  
220 **L.** (2015). Evaluating multispecies landscape connectivity in a threatened tropical mammal  
221 community. *Conserv Biol*, 29(1), 122-132. doi:10.1111/cobi.12337
- 222 **Brodie, J. F., Helmy, O. E., Brockelman, W. Y., & Maron, J. L.** (2009). Functional differences within  
223 a guild of tropical mammalian frugivores. *Ecology*, 90(3), 688-698.
- 224 **Bubenik, G. A., Brown, R. D., & Schams, D.** (1991). Antler cycle and endocrine parameters in male axis  
225 deer (*Axis axis*): seasonal levels of LH, FSH, testosterone, and prolactin and results of GnRH and  
226 ACTH challenge tests. *Comp Biochem Physiol A Comp Physiol*, 99(4), 645-650.
- 227 **Bubenik, G. A., Pomerantz, D. K., Schams, D., & Smith, P. S.** (1987). The role of androstenedione and  
228 testosterone in the reproduction and antler growth of a male white-tailed deer. *Acta Endocrinol*  
229 (*Copenh*), 114(1), 147-152.
- 230 **Bubenik, G. A., & Schams, D.** (1986). Relationship of age to seasonal levels of LH, FSH, prolactin and  
231 testosterone in male, white-tailed deer. *Comp Biochem Physiol A Comp Physiol*, 83(1), 179-183.
- 232 **Chan, J. P., Tsai, H. Y., Chen, C. F., Tung, K. C., & Chang, C. C.** (2009). The reproductive performance  
233 of female Formosan sambar deer (*Cervus unicolor swinhoei*) in semi-domesticated herds.  
234 *Theriogenology*, 71(7), 1156-1161. doi:10.1016/j.theriogenology.2008.12.007
- 235 **Chang, A. M., Chen, C. C., Chang, C. D., Huang, Y. L., Ke, G. M., & Walther, B. A.** (2018).  
236 Encephalitis induced by a newly discovered ruminant rhadinovirus in a free-living Formosan  
237 sambar deer (*Rusa unicolor swinhoei*). *J Vet Med Sci*, 80(5), 810-813. doi:10.1292/jvms.17-0477
- 238 **Chapman, N. G., & Harris, S.** (1991). Evidence that the seasonal antler cycle of adult Reeves' muntjac  
239 (*Muntiacus reevesi*) is not associated with reproductive quiescence. *J Reprod Fertil*, 92(2), 361-  
240 369.
- 241 **Chellappandian, M., Pandikumar, P., Mutheeswaran, S., Gabriel Paulraj, M., Prabakaran, S.,**  
242 **Duraipandiyan, V., . . . Al-Dhabi, N. A.** (2014). Documentation and quantitative analysis of local  
243 ethnozoological knowledge among traditional healers of Theni district, Tamil Nadu, India. *J*  
244 *Ethnopharmacol*, 154(1), 116-130. doi:10.1016/j.jep.2014.03.028
- 245 **Chen, R., Cui, Y., Zhang, X., Zhang, Y., Chen, M., Zhou, T., . . . Pan, C.** (2018). Chlorpyrifos Induction  
246 of Testicular-Cell Apoptosis through Generation of Reactive Oxygen Species and Phosphorylation  
247 of AMPK. *J Agric Food Chem*, 66(47), 12455-12470. doi:10.1021/acs.jafc.8b03407
- 248 **Dahlan, I., & Dawend, J.** (2013). Growth and reproductive performance of sambar deer in Sabal Forest  
249 Reserve of Sarawak, Malaysia. *Trop Anim Health Prod*, 45(7), 1469-1476. doi:10.1007/s11250-  
250 013-0383-6
- 251 **Forsyth, D. M., Woodford, L., Moloney, P. D., Hampton, J. O., Woolnough, A. P., & Tucker, M.**  
252 (2014). How does a carnivore guild utilise a substantial but unpredictable anthropogenic food  
253 source? Scavenging on hunter-shot ungulate carcasses by wild dogs/dingoes, red foxes and feral  
254 cats in south-eastern Australia revealed by camera traps. *PLoS One*, 9(2), e97937.  
255 doi:10.1371/journal.pone.0097937
- 256 **Gupta, S. K., Kumar, A., Angom, S., Singh, B., Ghazi, M. G. U., Tuboi, C., & Hussain, S. A.** (2018).  
257 Genetic analysis of endangered hog deer (*Axis porcinus*) reveals two distinct lineages from the  
258 Indian subcontinent. *Sci Rep*, 8(1), 16308. doi:10.1038/s41598-018-34482-9
- 259 **Hoogstraal, H., & Wassef, H. Y.** (1982). *Haemaphysalis* (*Garnhamphysalis*) *mjoebergi*: identity,  
260 structural variation and biosystematic implications, deer hosts, and distribution in Borneo and  
261 Sumatra (Ixodoidea: Ixodidae). *J Parasitol*, 68(1), 138-144.
- 262 **Hu, P. F., Xu, J. P., Ai, C., Shao, X. J., Wang, H. L., Dong, Y. M., . . . Xiumei, X.** (2017). Screening  
263 weight related genes of velvet antlers by whole genome re-sequencing. *Yi Chuan*, 39(11), 1090-  
264 1101. doi:10.16288/j.ycz.17-116
- 265 **Ismail, D., & Jiwan, D.** (2015). Browsing preference and ecological carrying capacity of sambar deer  
266 (*Cervus unicolor brookei*) on secondary vegetation in forest plantation. *Anim Sci J*, 86(2), 225-  
267 237. doi:10.1111/asj.12271
- 268 **Jerrett, I. V., Slee, K. J., & Robertson, B. I.** (1990). Yersiniosis in farmed deer. *Aust Vet J*, 67(6), 212-  
269 214.

Effect of testosterone on antler growth

- 270 **Lemaitre, J. F., Cheynel, L., Douhard, F., Bourgoïn, G., Debias, F., Ferte, H., . . . Gaillard, J. M.**  
271 (2018). The influence of early-life allocation to antlers on male performance during adulthood:  
272 Evidence from contrasted populations of a large herbivore. *J Anim Ecol*, 87(4), 921-932.  
273 doi:10.1111/1365-2656.12833
- 274 **Li, Y., Ba, H., & Yang, F.** (2016). Complete mitochondrial genome of *Cervus elaphus songaricus*  
275 (Cetartiodactyla: Cervinae) and a phylogenetic analysis with related species. *Mitochondrial DNA*  
276 *A DNA Mapp Seq Anal*, 27(1), 620-621. doi:10.3109/19401736.2014.908373
- 277 **Lin, C. S., Pei, K. J., Wang, P. S., & Liu, B. T.** (2014). Evidence of higher levels of testosterone during  
278 the velvet period in muntjac than in other cervids. *Theriogenology*, 81(3), 403-406.  
279 doi:10.1016/j.theriogenology.2013.10.011
- 280 **Lincoln, G. A., Fraser, H. M., & Fletcher, T. J.** (1982). Antler growth in male red deer (*Cervus elaphus*)  
281 after active immunization against LH-RH. *J Reprod Fertil*, 66(2), 703-708.
- 282 **Lincoln, G. A., Fraser, H. M., & Fletcher, T. J.** (1984). Induction of early rutting in male red deer (*Cervus*  
283 *elaphus*) by melatonin and its dependence on LHRH. *J Reprod Fertil*, 72(2), 339-343.
- 284 **Loudon, A. S., & Curlewis, J. D.** (1988). Cycles of antler and testicular growth in an aseasonal tropical  
285 deer (*Axis axis*). *J Reprod Fertil*, 83(2), 729-738.
- 286 **Meng, S., Zhang, X., Xu, M., Heng, B. C., Dai, X., Mo, X., . . . Deng, X.** (2015). Effects of deer age on  
287 the physicochemical properties of deproteinized antler cancellous bone: an approach to optimize  
288 osteoconductivity of bone graft. *Biomed Mater*, 10(3), 035006. doi:10.1088/1748-  
289 6041/10/3/035006
- 290 **Muir, P. D., Semiadi, G., Asher, G. W., Broad, T. E., Tate, M. L., & Barry, T. N.** (1997). Sambar deer  
291 (*Cervus unicolor*) x red deer (*C. elaphus*) interspecies hybrids. *J Hered*, 88(5), 366-372.
- 292 **Muir, P. D., Sykes, A. R., & Barrell, G. K.** (1988). Changes in blood content and histology during growth  
293 of antlers in red deer (*Cervus elaphus*) and their relationship to plasma testosterone levels. *J Anat*,  
294 158, 31-42.
- 295 **Munk, B. A., Garrison, E., Clemons, B., & Keel, M. K.** (2015). Antleroma in a free-ranging white-tailed  
296 deer (*Odocoileus virginianus*). *Vet Pathol*, 52(1), 213-216. doi:10.1177/0300985814528216
- 297 **Oria, A. P., Gomes Junior, D. C., Oliveira, A. V., Curvelo, V. P., Estrela-Lima, A., Pinna, M. H., . . .**  
298 **Ofri, R.** (2015). Selected ophthalmic diagnostic tests, bony orbit anatomy, and ocular histology in  
299 sambar deer (*Rusa unicolor*). *Vet Ophthalmol*, 18 Suppl 1, 125-131. doi:10.1111/vop.12221
- 300 **Pereira, R. J., Duarte, J. M., & Negrao, J. A.** (2005). Seasonal changes in fecal testosterone  
301 concentrations and their relationship to the reproductive behavior, antler cycle and grouping  
302 patterns in free-ranging male Pampas deer (*Ozotoceros bezoarticus bezoarticus*). *Theriogenology*,  
303 63(8), 2113-2125. doi:10.1016/j.theriogenology.2004.08.014
- 304 **Pothana, L., Devi, L., & Goel, S.** (2017). Cryopreservation of adult cervid testes. *Cryobiology*, 74, 103-  
305 109. doi:10.1016/j.cryobiol.2016.11.008
- 306 **Price, J., Fauchaux, C., & Allen, S.** (2005). Deer antlers as a model of Mammalian regeneration. *Curr*  
307 *Top Dev Biol*, 67, 1-48. doi:10.1016/S0070-2153(05)67001-9
- 308 **Price, J. S., Allen, S., Fauchaux, C., Althnaian, T., & Mount, J. G.** (2005). Deer antlers: a zoological  
309 curiosity or the key to understanding organ regeneration in mammals? *J Anat*, 207(5), 603-618.  
310 doi:10.1111/j.1469-7580.2005.00478.x
- 311 **Quispe, R., Yohannes, E., & Gahr, M.** (2018). Seasonality at the equator: isotope signatures and hormonal  
312 correlates of molt phenology in a non-migratory Amazonian songbird. *Front Zool*, 15, 39.  
313 doi:10.1186/s12983-018-0284-7
- 314 **Radhakrishnan, S., Gopalan, A. K., Ravindran, R., Rajagopal, K., Sooryadas, S., & Promod, K.**  
315 (2012). First record of *Chrysomya albiceps* Wiedemann, 1819 (Diptera: Calliphoridae) maggots  
316 from a sambar deer (*Rusa unicolor*) in Kerala, South India. *J Parasit Dis*, 36(2), 280-282.  
317 doi:10.1007/s12639-012-0110-7
- 318 **Rajapaksha, W. R., Thilakaratne, I. D., Chandrasiri, A. D., & Niroshan, T. D.** (2002). Development  
319 of PCR assay for differentiation of some important wild animal meat of Sri Lanka. *J Vet Med B*  
320 *Infect Dis Vet Public Health*, 49(7), 322-324.
- 321 **Somma, A. T., Moura, C. M., Lange, R. R., Medeiros, R. S., & Montiani-Ferreira, F.** (2016).  
322 Congenital cataract associated with persistent hyperplastic primary vitreous and persistent tunica  
323 vasculosa lentis in a sambar deer (*Rusa unicolor*) - clinical, ultrasonographic, and histological  
324 findings. *Clin Case Rep*, 4(7), 636-642. doi:10.1002/ccr3.500
- 325 **Spratt, K. S., Spratt, J. S., Bauman, J. E., & Chandler, C. R.** (2018). Behavioral and endocrine correlates  
326 of dominance in captive female Jackson's hartebeest (*Alcelaphus buselaphus*). *Zoo Biol*.  
327 doi:10.1002/zoo.21462
- 328 **Suttie, J. M., Fennessy, P. F., Lapwood, K. R., & Corson, I. D.** (1995). Role of steroids in antler growth  
329 of red deer stags. *J Exp Zool*, 271(2), 120-130. doi:10.1002/jez.1402710207

Effect of testosterone on antler growth

- 330 **Suttie, J. M., Lincoln, G. A., & Kay, R. N.** (1984). Endocrine control of antler growth in red deer stags.  
331 *J Reprod Fertil*, 71(1), 7-15.
- 332 **Thapa, K., & Kelly, M. J.** (2017). Density and carrying capacity in the forgotten tigerland: Tigers in the  
333 understudied Nepalese Churia. *Integr Zool*, 12(3), 211-227. doi:10.1111/1749-4877.12240
- 334 **Ventrella, D., Elmi, A., Barone, F., Carnevali, G., Govoni, N., & Bacci, M. L.** (2018). Hair Testosterone  
335 and Cortisol Concentrations in Pre- and Post-Rut Roe Deer Bucks: Correlations with Blood Levels  
336 and Testicular Morphometric Parameters. *Animals (Basel)*, 8(7). doi:10.3390/ani8070113
- 337 **Vongpralub, T., Chinchayanond, W., Hongkuntod, P., Sanchaisuriya, P., Liangpaiboon, S.,  
338 Thongprayoon, A., & Somphol, N.** (2015). Cryopreservation of Sambar deer semen in Thailand.  
339 *Zoo Biol*, 34(4), 335-344. doi:10.1002/zoo.21214
- 340 **Wilson, P. R., Walker, I. H., Bond, D. B., Middleberg, A., & Staples, L. D.** (1991). Field evaluation of  
341 melatonin implants to advance the breeding season in 1-year-old farmed red deer hinds. *N Z Vet*  
342 *J*, 39(1), 23-28. doi:10.1080/00480169.1991.35651
- 343

WITHDRAWN  
see manuscript DOI for details
